# Supplementary material for: Weak interactions in the assembly of strongly chemisorbed molecules
Source: Royal Society of Chemistry journal article supplement (doi:10.1039/c1cc12538a), 2011-01-01
Supplement: c1cc12538a.pdf [file c1cc12538a.pdf]

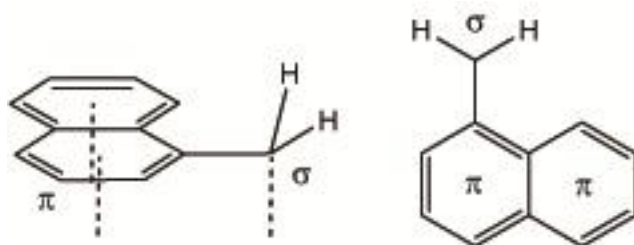

Scheme S1 : Schematic representations of the  $\pi$ + $\sigma$ -bonded surface species formed by partially dehydrogenated methylnaphthalene on Pt(111) at room temperature.
